# Supplementary material for: Yeast derivatives as a source of bioactive components in animal nutrition: A brief review
Source: Frontiers journal article supplement (doi:10.3389/fvets.2022.1067383), 2023-01-06
Supplement: Table_1.DOCX [file Table_1.DOCX]

| **Table 1. Nutrient Composition of Intact Nutritional Yeast Sources1** | | | | |
| --- | --- | --- | --- | --- |
| **Nutrient, % as is** | **Mean** | **Std Dev** | **Min** | **Max** |
|  | Bakers & Brewers Yeast (*Saccharomyces cerevisiae*) | | | |
| Dry Matter | 95.10 | 1.34 | 93.43 | 96.90 |
| Crude Protein (N x 6.25) | 44.75 | 5.50 | 39.75 | 56.41 |
| Starch | 4.51 | 2.89 | n.d. 2 | 17.5 |
| Ether Extract | 1.62 | 0.61 | 0.35 | 2.26 |
| Ash | 5.19 | 0.30 | 4.87 | 5.86 |
| Crude Fiber | 1.90 | 1.30 | 0.1 | 4.4 |
| Neutral Detergent Fiber (NDF) | 10.05 | 9.40 | n.d. | 20.7 |
| Acid Detergent Fiber (ADF) | 5.87 | 2.50 | n.d. | 5.70 |
| Non-Starch Polysaccharides | 20.21 | 6.54 | 14.47 | 33.19 |
| Glucan/Glucose | 10.38 | 2.90 | 6.46 | 14.34 |
| Mannan/Mannose | 7.81 | 4.17 | 0.55 | 14.80 |
| Lysine | 4.54 | 0.90 | 4.60 | 7.60 |
| Methionine | 1.05 | 0.30 | 1.30 | 2.20 |
| Cysteine | 0.62 | 0.60 | 0.33 | 1.9 |
| Threonine | 3.18 | 0.70 | 3.70 | 5.60 |
| Tryptophan | 0.79 | 0.20 | 1.00 | 1.40 |
| Calcium | 0.29 | 0.11 | 0.10 | 0.54 |
| Phosphorus | 1.31 | 0.24 | 0.96 | 2.00 |
| Nucleotides | 0.06 | 0.08 | n.d. | 0.11 |
|  | Torula Yeast (*Candida utilis*) | | | |
| Dry Matter | 94.83 | 0.62 | 94.00 | 95.83 |
| Crude Protein (N x 6.25) | 52.04 | 0.66 | 51.44 | 53.48 |
| Ether Extract | 0.16 | 0.10 | 0.07 | 0.36 |
| Ash | 8.44 | 0.60 | 7.04 | 8.88 |
| Crude Fiber | 2.07 | 2.79 | 0.08 | 6.2 |
| Non-Starch Polysaccharides | 21.83 | 1.75 | 19.17 | 23.87 |
| Glucan/Glucose | 11.82 | 0.76 | 10.60 | 13.32 |
| Mannan/Mannose | 9.28 | 1.37 | 7.17 | 10.46 |
| Arabinose | 0.73 | 0.23 | 0.43 | 0.98 |
| Lysine | 4.88 | 1.36 | 3.45 | 6.68 |
| Methionine | 0.76 | 0.34 | 0.38 | 1.14 |
| Cysteine | 0.74 | 0.27 | 0.49 | 1.02 |
| Threonine | 3.26 | 1.10 | 2.35 | 4.55 |
| Tryptophan | 0.57 | 0.07 | 0.52 | 0.62 |
| Calcium | 0.23 | 0.09 | 0.13 | 0.47 |
| Phosphorus | 2.43 | 0.61 | 1.78 | 0.61 |
| Nucleotides | 1.44 | 1.81 | 0.04 | 3.49 |
| **1** Adapted from: CBS Bio-Platforms Inc. internal analyses 2020-2022; Evonik AMINODat 6.1 2021; Feedipedia.org 2022  **2** not detected | | | | |

| **Table 2. Nutrient Composition of Yeast Derivatives1** | | | | |
| --- | --- | --- | --- | --- |
| **Nutrient, % as is** | **Mean** | **Std Dev** | **Min** | **Max** |
|  | Yeast Cell Wall (from: *Saccharomyces cerevisiae*) | | | |
| Dry Matter | 95.81 | 1.62 | 91.91 | 99.71 |
| Crude Protein (N x 6.25) | 32.53 | 8.13 | 15.81 | 47.22 |
| Ether Extract | 0.69 | 1.01 | n.d. **2** | 5.44 |
| Ash | 3.79 | 1.11 | 2.17 | 5.66 |
| Non-Starch Polysaccharides | 37.88 | 6.42 | 27.77 | 54.55 |
| Glucan/Glucose | 22.28 | 4.17 | 11.69 | 36.59 |
| Mannan/Mannose | 15.49 | 4.68 | 6.74 | 27.30 |
| Arabinose | 0.33 | 0.16 | 0.13 | 0.67 |
| Nucleotides | n.d. | n.d. | n.d. | n.d. |
|  | Yeast Extract (from: *Saccharomyces cerevisiae*) | | | |
| Dry Matter | 96.47 | 0.45 | 95.87 | 97.23 |
| Crude Protein (N x 6.25) | 53.22 | 11.77 | 43.09 | 69.21 |
| Ether Extract | 0.28 | 0.18 | 0.03 | 0.65 |
| Ash | 19.12 | 6.36 | 10.35 | 25.79 |
| Non-Starch Polysaccharides | 9.32 | 2.25 | 6.77 | 11.05 |
| Glucan/Glucose | 6.64 | 5.3 | 0.56 | 10.26 |
| Mannan/Mannose | 2.61 | 3.12 | 0.79 | 6.21 |
| Nucleotides | 15.06 | 10.88 | 3.05 | 40.20 |
| **1** From: CBS Bio-Platforms Inc. internal analyses 2020-2022  **2** not detected | | | | |
